# Supplementary material for: DNA methylation testing with S5 for triage of high‐risk HPV positive women
Source: PubMed Central journal article supplement (PMC9543033; doi:10.1002/ijc.34050), 2022-05-24
Supplement: IJC-151-993-s001.pdf [file IJC-151-993-s001.pdf]

## **DNA methylation testing with S5 for triage of high-risk HPV positive women**

Rachael Adcock, Belinda Nedjai, Attila Lorincz, Dorota Scibior-Bentkowska, Rawinder Banwait, Norah Torres-Martinez, Michael Robertson, Jack Cuzick, Cosette M Wheeler on behalf of the New Mexico HPV Pap Registry Steering Committee

### **Table of Contents**

**Supplementary Table S1:** Area under the curve (AUC) and 95% Confidence Intervals for comparisons restricted to <CIN2, CIN2 and CIN3+ endpoints for hrHPV positive women with abnormal cytology, re-weighted to represent hrHPV positive biopsied women (n=3797). All AUC values had  $P < 0.001$  vs no difference (AUC = 0.500).

**Supplementary Table S2:** Concordance between clinical HPV DNA data and research use of Linear Array HPV genotyping for the S5 sample of women with screening cytology and cervical biopsy within 12 months (n=798).

**Supplementary Table S3:** Sensitivity and specificity for combinations of HPV genotyping and S5 methylation restricted to biopsied women with abnormal cytology excluding high-grade cytology (HSIL+, AGC and ASC-H), for CIN3+, CIN2+ and CIN2 endpoints, re-weighted to represent hrHPV positive biopsied women (n=3014).

**Supplementary Table S4:** Positive Predictive Value (PPV) and sensitivity of a second triage test restricted to hrHPV positive women with abnormal cytology excluding high-grade cytology (HSIL+, AGC and ASC-H), for CIN3+, CIN2+ and CIN2 endpoints, re-weighted to represent hrHPV positive biopsied women (n=3014).

**Supplementary Figure S1:** Consort diagram

**Supplementary Figure S2:** Histogram of S5 score by genotype (HPV16, HPV18, HPV31/33 and other hrHPV) for hrHPV positive women with screening cytology. Percentages add to 100% in each HPV group.

Supplementary Table S1: Area under the curve (AUC) and 95% Confidence Intervals for comparisons restricted to <CIN2, CIN2 and CIN3+ endpoints for hrHPV positive women with abnormal cytology, re-weighted to represent hrHPV positive biopsied women (n=3797). All AUC values had P<0.001 vs no difference (AUC = 0.500).

| Comparison     | AUC (95% CI)         |
|----------------|----------------------|
| <CIN2 vs CIN2  | 0.644 (0.596, 0.691) |
| <CIN2 vs CIN2+ | 0.715 (0.676, 0.753) |
| <CIN2 vs CIN3  | 0.790 (0.746, 0.843) |
| <CIN2 vs CIN3+ | 0.796 (0.754, 0.839) |
| CIN2 vs CIN3   | 0.684 (0.635, 0.733) |
| CIN2 vs CIN3+  | 0.693 (0.646, 0.741) |
| <CIN3 vs CIN3  | 0.773 (0.730, 0.816) |
| <CIN3 vs CIN3+ | 0.780 (0.739, 0.821) |

hrHPV: high-risk Human Papillomavirus; AUC: Area Under the Curve; CI: Confidence Interval; CIN2: Cervical Intraepithelial Neoplasia grade 2 [CIN2] or greater [CIN2+]; CIN3: Cervical Intraepithelial Neoplasia grade 3 [CIN3] or greater [CIN3+]

Supplementary Table S2: Concordance between clinical HPV DNA data and research use of Linear Array HPV genotyping for the S5 sample of women with screening cytology and cervical biopsy within 12 months (n=798).

|                         |                | Clinical HPV |           |                                            |                                  |                   | No clinical<br>hrHPV data | Total |
|-------------------------|----------------|--------------|-----------|--------------------------------------------|----------------------------------|-------------------|---------------------------|-------|
|                         |                | HPV16        | HPV18     | HPV16/18 negative,<br>other hrHPV positive | hrHPV positive,<br>no genotyping | hrHPV<br>negative |                           |       |
| <b>Linear<br/>Array</b> | HPV16          | <b>185</b>   | 1         | 1                                          | 11                               | 0                 | 66                        | 264   |
|                         | HPV18          | 0            | <b>38</b> | 2                                          | 2                                | 0                 | 5                         | 47    |
|                         | Other<br>hrHPV | 2            | 0         | <b>352</b>                                 | 24                               | 7                 | 102                       | 487   |
| Total                   |                | 187          | 39        | 355                                        | 37                               | 7                 | 173                       | 798   |

Numbers in **bold** are concordant.

hrHPV: high-risk Human Papillomavirus

Clinical HPV testing was performed using the Cobas HPV assay (93%), the Aptima HPV assay (2%) and the Hybrid Capture 2 assay (6%)

Supplementary Table S3: Sensitivity and specificity for combinations of HPV genotyping and S5 methylation restricted to biopsied women with abnormal cytology excluding high-grade cytology (HSIL+, AGC and ASC-H), for CIN3+, CIN2+ and CIN2<sup>a</sup> endpoints, re-weighted to represent hrHPV positive biopsied women (n=3014).

| Marker (n positive)        |      | CIN3+ (n=171) |                         |                         | CIN2+ (n=498) |                         |                         | CIN2 <sup>a</sup> (n=327) |                         |                          |
|----------------------------|------|---------------|-------------------------|-------------------------|---------------|-------------------------|-------------------------|---------------------------|-------------------------|--------------------------|
|                            |      | n             | Sensitivity (95% CI)    | Specificity (95% CI)    | n             | Sensitivity (95% CI)    | Specificity (95% CI)    | n                         | Sensitivity (95% CI)    | Specificity (95% CI)     |
| HPV16 positive             | 541  | 74            | 43.28<br>(39.10, 47.45) | 83.58<br>(40.46, 86.70) | 161           | 32.38<br>(28.44, 36.33) | 84.91<br>(81.89, 87.93) | 87                        | 26.67<br>(22.66, 30.68) | 84.91<br>(81.66, 88.16)  |
| HPV18 positive             | 120  | 13            | 7.42<br>(2.73, 12.11)   | 96.23<br>(92.82, 99.64) | 35            | 6.92<br>(2.38, 11.47)   | 96.61<br>(93.37, 99.85) | 22                        | 6.67<br>(1.94, 11.39)   | 96.61<br>(93.18, 100.04) |
| HPV16/18 positive          | 661  | 87            | 50.69<br>(46.88, 54.50) | 79.81<br>(76.75, 82.87) | 196           | 39.31<br>(35.58, 43.03) | 81.52<br>(78.56, 84.48) | 109                       | 33.33<br>(29.48, 37.19) | 81.52<br>(78.34, 84.69)  |
| HPV31/33 positive          | 359  | 30            | 17.24<br>(13.33, 21.14) | 88.40<br>(85.09, 91.71) | 80            | 16.13<br>(12.33, 19.94) | 88.91<br>(85.67, 92.16) | 51                        | 15.56<br>(11.64, 19.47) | 88.91<br>(85.53, 92.30)  |
| HPV16/18/31/33 positive    | 1020 | 116           | 67.93<br>(65.07, 70.79) | 68.21<br>(65.35, 71.07) | 276           | 55.44<br>(52.39, 58.49) | 70.43<br>(67.63, 73.23) | 160                       | 48.89<br>(45.63, 52.15) | 70.43<br>(67.46, 73.41)  |
| other hrHPV positive       | 1994 | 55            | 32.07<br>(30.02, 34.12) | 31.79<br>(29.74, 33.83) | 222           | 44.56<br>(42.38, 46.74) | 29.57<br>(27.56, 31.57) | 167                       | 51.11<br>(48.89, 53.34) | 29.57<br>(27.54, 31.60)  |
| S5 positive                | 1201 | 125           | 72.87<br>(70.36, 75.39) | 62.16<br>(59.41, 64.90) | 310           | 62.24<br>(59.50, 64.99) | 64.60<br>(61.90, 67.31) | 185                       | 56.67<br>(53.71, 59.63) | 64.60<br>(61.74, 67.46)  |
| S5 positive (≥1.4 cut-off) | 864  | 108           | 63.05<br>(59.84, 66.27) | 73.42<br>(70.48, 76.37) | 252           | 50.48<br>(47.15, 53.82) | 75.67<br>(72.81, 78.53) | 143                       | 43.89<br>(40.35, 47.43) | 75.67<br>(72.61, 78.73)  |
| S5 or HPV16 positive       | 1265 | 136           | 79.05<br>(76.81, 81.30) | 60.28<br>(57.59, 62.98) | 335           | 67.29<br>(64.70, 69.87) | 63.06<br>(60.40, 65.72) | 200                       | 61.11<br>(58.27, 63.95) | 63.06<br>(60.25, 65.88)  |
| S5 or HPV18 positive       | 1260 | 125           | 72.87<br>(70.42, 75.33) | 60.07<br>(57.37, 62.78) | 323           | 64.79<br>(62.16, 67.43) | 62.75<br>(60.08, 65.42) | 198                       | 60.56<br>(57.71, 63.40) | 62.75<br>(59.94, 65.56)  |
| S5 or HPV16/18 positive    | 1324 | 136           | 79.05<br>(76.86, 81.25) | 58.20<br>(55.54, 60.85) | 348           | 69.84<br>(67.36, 72.31) | 61.21<br>(58.59, 63.83) | 212                       | 65.00<br>(62.29, 67.71) | 61.21<br>(58.44, 63.98)  |
| S5 or HPV31/33 positive    | 1386 | 136           | 79.05<br>(76.91, 81.20) | 56.01<br>(53.40, 58.62) | 341           | 68.38<br>(65.93, 70.83) | 58.45<br>(55.85, 61.04) | 205                       | 62.78<br>(60.10, 65.46) | 58.45<br>(55.72, 61.18)  |

|                               |      |     |                         |                         |     |                         |                         |     |                         |                         |
|-------------------------------|------|-----|-------------------------|-------------------------|-----|-------------------------|-------------------------|-----|-------------------------|-------------------------|
| S5 or HPV16/18/31/33 positive | 1509 | 146 | 85.24<br>(83.45, 87.03) | 52.05<br>(49.53, 54.57) | 379 | 75.97<br>(73.82, 78.13) | 55.06<br>(52.55, 57.57) | 232 | 71.11<br>(68.71, 73.52) | 55.06<br>(52.42, 57.70) |
| S5 or other hrHPV positive    | 2706 | 150 | 87.64<br>(86.40, 88.88) | 10.11<br>(8.97, 11.24)  | 430 | 86.27<br>(84.98, 87.57) | 9.54<br>(8.44, 10.65)   | 280 | 85.56<br>(84.19, 86.92) | 9.54<br>(8.41, 10.68)   |

Data re-weighted to biopsied population. Note that CIN2 is treated as a false positive for the CIN3+ analysis.

<sup>a</sup> Denominator excludes CIN3+ women (n=171).

hrHPV: high-risk Human Papillomavirus; CIN2: Cervical Intraepithelial Neoplasia grade 2 [CIN2] or greater [CIN2+]; CIN3: Cervical Intraepithelial Neoplasia grade 3 [CIN3] or greater [CIN3+]; PPV: Positive Predictive value; CI: Confidence Interval; HSIL: High-grade Squamous Intraepithelial Lesion or greater [HSIL+]; AGC: Atypical Glandular Cells; ASC-H: Atypical Squamous Cells – cannot rule out HSIL.

Supplementary Table S4: Positive Predictive Value (PPV) and sensitivity of a second triage test restricted to hrHPV positive women with abnormal cytology excluding high-grade cytology (HSIL+, AGC and ASC-H), for CIN3+, CIN2+ and CIN2 endpoints, re-weighted to represent hrHPV positive biopsied women (n=3014).

| 1st triage test            | 2nd triage test           | n   | CIN3+ |                        |                         | CIN2+ |                         |                         | CIN2 <sup>a</sup> |                         |                         |
|----------------------------|---------------------------|-----|-------|------------------------|-------------------------|-------|-------------------------|-------------------------|-------------------|-------------------------|-------------------------|
|                            |                           |     | n     | PPV (95% CI)           | Sensitivity (95% CI)    | n     | PPV (95% CI)            | Sensitivity (95% CI)    | n                 | PPV (95% CI)            | Sensitivity (95% CI)    |
| HPV16 negative (n=2473)    | -                         |     | 97    | 3.93<br>(3.17, 4.70)   | 56.72<br>(54.77, 58.68) | 337   | 13.62<br>(12.27, 14.97) | 67.62<br>(65.77, 69.46) | 240               | 10.08<br>(8.87, 11.30)  | 73.33<br>(71.56, 75.11) |
|                            | S5 positive               | 724 | 61    | 8.48<br>(6.45, 10.51)  | 63.08<br>(59.56, 66.59) | 174   | 24.03<br>(20.92, 27.14) | 51.62<br>(47.98, 55.26) | 113               | 16.99<br>(14.13, 19.85) | 46.97<br>(43.17, 50.77) |
|                            | S5 positive (1.4 cut-off) | 406 | 44    | 10.97<br>(7.93, 14.01) | 45.76<br>(40.92, 50.61) | 119   | 29.32<br>(24.89, 33.75) | 35.31<br>(30.65, 39.96) | 74                | 20.61<br>(16.44, 24.78) | 31.06<br>(26.29, 35.83) |
| HPV16/18 negative (n=2353) | -                         |     | 85    | 3.59<br>(2.84, 4.34)   | 49.31<br>(47.29, 51.33) | 302   | 12.85<br>(11.50, 14.20) | 60.69<br>(58.72, 62.67) | 218               | 9.60<br>(8.39, 10.81)   | 66.67<br>(64.73, 68.61) |
|                            | S5 positive               | 663 | 49    | 7.33<br>(5.35, 9.32)   | 57.52<br>(53.76, 61.28) | 152   | 22.94<br>(19.74, 26.14) | 50.30<br>(46.50, 54.11) | 103               | 16.84<br>(13.88, 19.80) | 47.50<br>(43.55, 51.45) |
|                            | S5 positive (1.4 cut-off) | 369 | 38    | 10.34<br>(7.24, 13.45) | 45.13<br>(40.05, 50.21) | 105   | 28.55<br>(23.94, 33.16) | 34.83<br>(29.97, 39.69) | 67                | 20.31<br>(15.98, 24.65) | 30.83<br>(25.86, 35.81) |
| S5 negative (n=1813)       | -                         |     | 47    | 2.56<br>(1.84, 3.29)   | 27.13<br>(25.08, 29.17) | 188   | 10.37<br>(8.97, 11.77)  | 37.76<br>(35.53, 39.99) | 142               | 8.01<br>(6.75, 9.28)    | 43.33<br>(41.02, 45.64) |
|                            | HPV16 positive            | 64  | 11    | 16.58<br>(7.46, 25.70) | 22.79<br>(12.50, 33.07) | 25    | 39.31<br>(27.34, 51.29) | 13.35<br>(5.01, 21.69)  | 15                | 27.25<br>(15.29, 39.20) | 10.26<br>(2.11, 18.40)  |
|                            | HPV16/18 positive         | 123 | 11    | 8.60<br>(3.65, 13.56)  | 22.79<br>(15.38, 30.19) | 38    | 30.71<br>(22.56, 38.86) | 20.11<br>(13.03, 27.19) | 27                | 24.19<br>(16.28, 32.10) | 19.23<br>(11.95, 26.51) |

Data re-weighted to biopsied population.

<sup>a</sup> Denominator excludes CIN3+ women.

hrHPV: high-risk Human Papillomavirus; CIN2: Cervical Intraepithelial Neoplasia grade 2 [CIN2] or greater [CIN2+]; CIN3: Cervical Intraepithelial Neoplasia grade 3 [CIN3] or greater [CIN3+]; PPV: Positive Predictive value; CI: Confidence Interval; HSIL: High-grade Squamous Intraepithelial Lesion or greater [HSIL+]; AGC: Atypical Glandular Cells; ASC-H: Atypical Squamous Cells – cannot rule out HSIL.

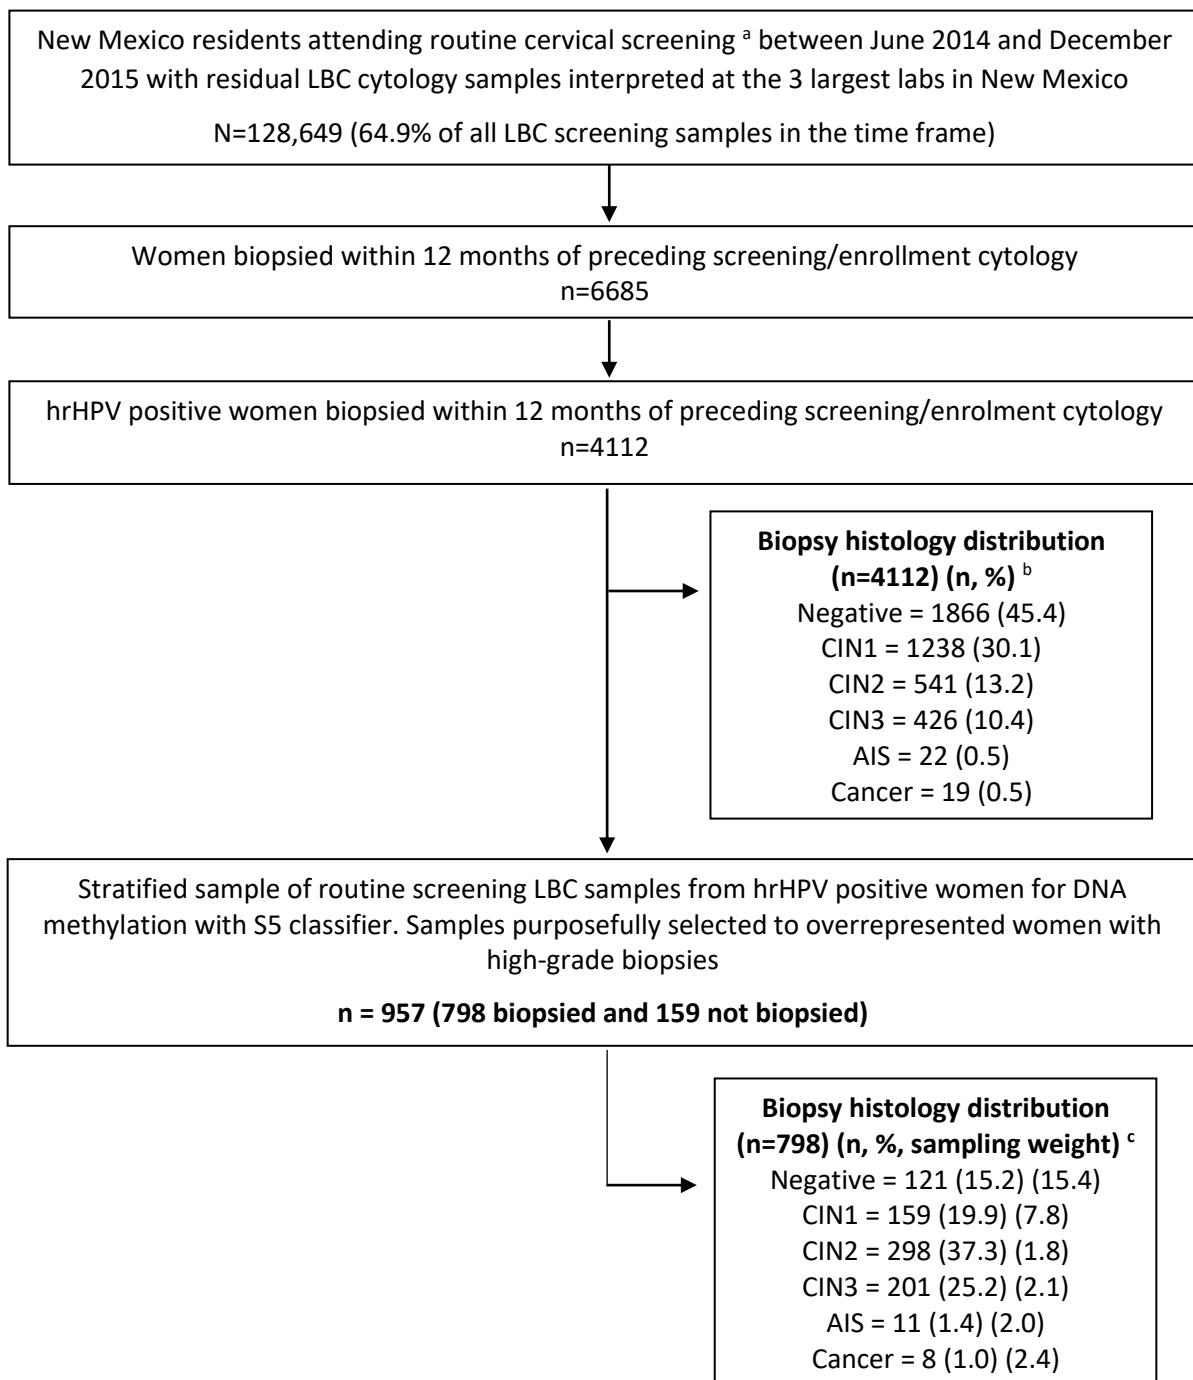

Supplementary Figure S1: Consort diagram

<sup>a</sup> Screening cytology defined as cytology with no prior hysterectomy and no prior cytology, HPV or biopsy in the past 300 days; <sup>b</sup> Highest biopsy diagnoses within 12 months of screening cytology restricted to earliest cytology chronologically per woman; <sup>c</sup> Samples selected to over represent high-grade disease.

hrHPV: high-risk Human Papillomavirus; LBC: Liquid Based Cytology; CIN1: Cervical Intraepithelial Neoplasia grade 1; CIN2: Cervical Intraepithelial Neoplasia grade 2; CIN3: Cervical Intraepithelial Neoplasia grade 3; AIS: Adenocarcinoma *in situ*.



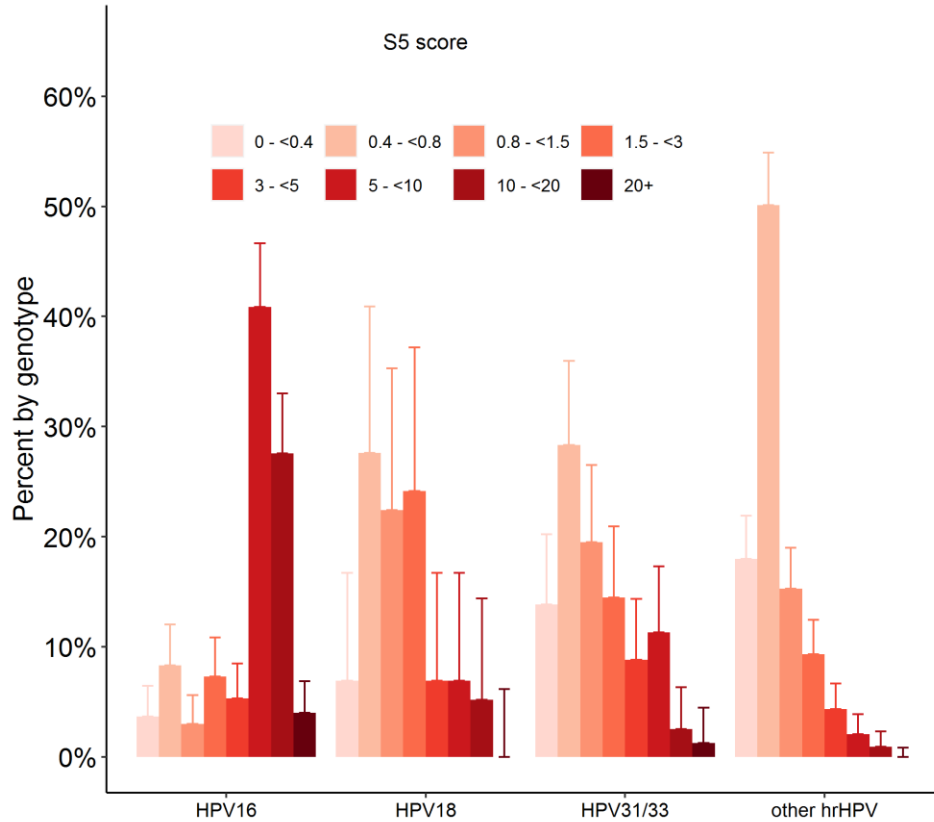

Supplementary Figure S2: Histogram of S5 score by genotype (HPV16, HPV18, HPV31/33 and other hrHPV) for hrHPV positive women with screening cytology. Percentages add to 100% in each HPV group.

hrHPV: high-risk Human Papillomavirus

A histogram showing the distribution of S5 scores (categorised) by HPV genotype (HPV16, HPV18, HPV31/33, other hrHPV types). Upper 95% confidence intervals are plotted. Percentage of S5 score sum to 100% within each genotype group. Higher risk HPV types are associated with greater proportions of higher S5 scores.
